# Supplementary material
Source: publisher figshare collection journal article supplement (https://gsapubs.figshare.com/ndownloader/files/23320121)
Supplement: Supplementary file 1 [file 23320121]

## Sheet: GPS Location
Locations of Stratigraphic Sections and OSL samples
Site	Northing	Easting	OSL ID
WIN1	3.86817e+06	621596	UNL 3676, 3677
WIN2	3.86851e+06	621212
WIN3	3.86908e+06	620999	UNL 3678
Kelso-1	3.87132e+06	616084	UNL 3152, 3150
Kelso-2	3.87023e+06	605885	UNL 3679, 3680
Kelso-3	3870113	605940	UNL 2383
Kelso-4	3870203	605677	UNL 3149
Kelso-5	3872067	617824	UNL 2381, 3148
Kelso-6	3.87288e+06	619353	UNL 3681
Sands-1	3.87628e+06	595444	UNL 3147, 3682
Kelso-W	3877543	592894	UNL 3151
KD-L1	3861583	618360	UNL 1973, 1974
Locations of other samples (geochemistry)
Site	Northing	Easting
Qf5	3.87003e+06	623916
CW2	3.87046e+06	615357
KDuneW	3.86091e+06	615010
WIN3	3.86852e+06	621221
WIN8	3.86812e+06	622516
CW-D	3862216	618423
Kcrest	3.79101e+06	617985
KD_sheet	3861583	618360
KS1	3871749	623332
KS3	3862465	618135
KW-A	3871311	616089
KW-C	3871311	616089
Moja1	3878922	565090
MOJA10	3.86469e+06	532406
MR1	3878720	565122
MR3	3878836	565110
MR5	3879016	565080
MR6	3877248	562059
PWD-1	3.87227e+06	622496
QE1	3865771	624829
UPK1	3872067	617824
UPK8	3.87023e+06	605885
WIN10b	3.86814e+06	622540
Win1a-E180	3.86817e+06	621596
Win1a-E230	3.86817e+06	621596
Win1b-B20	3.86817e+06	621596
WIN1c-240	3.86817e+06	621596
Win3-3	3.86908e+06	620999
Win3B-100	3.86908e+06	620999
Win3C-400	3.86908e+06	620999
Win4	3.86817e+06	621596
Win5	3.86809e+06	622439
Win6	3.86914e+06	620954
WIN9	3.86821e+06	621882
All locations in Zone 11S

## Sheet: Grain Size
Laser particle size analysis of facies from stratigraphic columns
Sample Name/Depth (cm)	Clay %	Silt %	Sand %	Gravel%	Note
WIN-1
630	4.29766	5.49921	90.2031	0
650	58.9069	25.3802	15.7128	0
675	35.8863	56.7356	7.37816	0
680	25.3072	20.6211	54.0717	0
690	39.1147	52.2483	8.63704	0
710	38.3859	57.7787	3.83532	0
720	24.6426	54.9491	20.4083	0
740	38.6609	46.3686	14.9705	0
760	39.0173	48.9726	12.0101	0
790	3.6787	2.98327	93.338	0
814	4.3554	5.01975	90.6248	0
820	1.88744	2.62055	95.492	0
880	1.26873	1.86753	96.8637	0
930	1.73228	2.40332	95.8644	0
WIN1-C
45	37.4128	57.8401	4.74711	0
55	9.53989	63.715	26.7451	0
75	48.764	28.3147	22.9214	0
130	3.83167	6.39576	89.7726	0
240	7.84747	5.51553	86.637	0
400	25.5877	58.8506	15.5617	0
420	11.8298	55.1576	33.0126	0
430	65.8237	29.7116	4.46466	0
453	5.97312	15.3251	78.7018	0
WIN-2
10	11.4269	17.672	70.9011	0
25	44.5507	49.7261	5.72318	0
40	48.8102	48.343	2.84684	0
72	4.34278	6.42611	89.2311	0
76	56.2361	20.7241	23.0398	0
90	54.2373	43.0908	2.67185	0
110	25.7063	19.6655	54.6282	0
255	10.1038	62.6987	27.1975	0
270	9.48197	22.5215	67.9965	0
285	36.1574	57.3219	6.52065	0
405	11.3306	20.6189	68.0505	0
408	46.4354	47.4488	6.11587	0
430	51.0739	48.4915	0.434535	0
450	12.7144	65.6393	21.6463	0
460	43.124	53.48	3.39594	0
480	1.13037	2.57995	96.2897	0
WIN-3	Clay %	Silt %	Sand %	Gravel%
0	0.007039	2.34141	97.6516	0	surface dune
10	3.611	4.35491	92.0341	0	sand matrix
160	0	2.63993	97.3601	0
280	0	3.00499	96.995	0
360	10.6628	28.9781	60.3591	0
450	0	0.029805	99.9702	0
560	1.92946	3.0273	95.0432	0
640	16.4679	65.195	18.3371	0	mud ball
740	1.70326	3.07525	95.2215	0
960	6.36359	24.5789	69.0575	0
970	38.603	52.8833	8.51364	0
Kelso-1
0	19.9	18.5	61.6	0
40	3.3	30.1	60.7	5.9
100	7.1	10.9	77.7	4.3
270	33.0151	30.6751	36.3098	0
320	10.4	19.5	58	12.1
370	18.1294	11.4977	70.3729	0
470	38.1359	46.6963	15.1678	0
540	51.7802	27.5156	20.7042	0
560	16.9824	16.043	66.9746	0
600	4	5	91	0
Kelso-2
65	8.69088	34.5232	56.7859	0
180	2.0965	8.53491	89.3686	0
Sands-1
30	14	18	68	0
40	16.6732	67.7585	15.5683	0
60	10.736	67.62	21.644	0
116	8.04051	13.6882	78.2713	0
Kelso-5
60	5	8	87	0
160	3	7	90	0
Kelso-6
91	6.23244	15.9899	77.7776	0

## Sheet: Geochemistry
XRF Geochemistry of eolian and alluvial units
	Kelso Dunes, West						Kelso Dunes, East						Buried Eolian													Mojave River						Alluvial Fan - Winston
	KS2	KS3	KDuneW	Kcrest	CW2	CW-D	PWD-1	WIN3	WIN8	KS1	Win5	Win6	UPK8	UPK1	KW-C	KD_sheet	Win4	WIN9	WIN10b	Qf5	Win3B-100	Win3C-400	Win1a-E230	Win1a-E180	QE1	MOJA10	Moja1	MR1	MR3	MR5	MR6	WIN1c-240	Win1b-B20	Win3-3	KW-A
	Normalized Major Elements (Weight %):
K2O	3.61131	3.30987	3.26329	3.44494	3.59386	3.09077	3.24234	3.56821	3.59576	3.5248	3.4528	3.4432	3.41537	3.32262	3.39439	3.31719	3.43219	3.61547	3.70863	3.48862	3.38894	3.39566	3.4685	3.50582	3.53175	3.02046	3.20194	3.13429	3.10614	3.0593	3.218	3.3356	3.36279	3.41961	3.40169
	Unnormalized Trace Elements (ppm):
Ba	989.574	917.076	898.485	940.773	941.867	859.4	740.778	938.385	921.669	866.896	875.7	900.7	891.619	824.5	924.5	886.7	878.6	933.211	946.544	869.1	905.8	888.7	878.2	890.6	911.7	821.97	873.2	852.9	850.8	840.7	871.6	892.386	864.3	894.1	876.8
Rb	104.529	97.2549	91.8385	96.0175	100.296	87.6	99.102	99.7985	101.49	109.94	97.4	96.7	98.0075	99.862	92.6	92.1	96.5	101.39	105.171	99.7	95.6	95.2	97.1	98.2	103.39	89.8485	89.2	94.8	93.4	96.2	95.9	96.709	96.3	98.98	97.6
	Ratio:
K/Ba	36.4935	36.0916	36.3199	36.6182	38.1568	35.9643	43.7694	38.025	39.0136	40.66	39.4291	38.2281	38.3053	40.2986	36.716	37.4105	39.0643	38.7423	39.1808	40.1406	37.4137	38.2093	39.4956	39.3647	38.7381	36.7466	36.669	36.7487	36.5084	36.39	36.9206	37.3785	38.9077	38.2464	38.7966
K/Rb	345.483	340.33	355.329	358.782	358.326	352.828	327.172	357.541	354.297	320.612	354.497	356.071	348.481	332.721	366.565	360.172	355.667	356.589	352.627	349.912	354.491	356.687	357.209	357.009	341.595	336.173	358.961	330.622	332.563	318.015	335.558	344.911	349.2	345.485	348.534
